# Supplementary material
Source: Research Square preprint supplement (doi:10.21203/rs.3.rs-9927984/v1)
Supplement: Supplementary file 1 [file 8d44079920efecb3d0e6dfb4.docx]

| **Dear colleague,**  **Please help the negotiations between the Hungarian GPs and the Government with your answers to use among our arguments.**  **Please provide a detailed answers to my questions regarding your country of residence/working, extend the boxes and add your comments if required, and send to me:** | | | |
| --- | --- | --- | --- |
| **YOUR** | **country** | **email** |  |
| **name** |  |  | |
| PROFESSIONAL **SUPPORT** | | | |
| Are there any available **specific** **primary care** guidelines? | Yes | No |  |
| If yes, focusing for which morbidities?  Please list them | | | |
| Is it in your country an **Institute** to give **methodological support** **specifically** for primary care?  The Name of this institute:  If they have a website in **English**, please write here: |  | | |
| How is the GP provision supervised?  by health authorities (local or governmental), other body? |  | | |
| Is the membership of a National Medical Chamber is compulsory for doctors and GPs? |  |  |  |
| Is a specific Trade Union/professional organization for doctors in your country? |  | | and for GPs? |
| **COMPETENCES** for prescriptions: | | | |
| Could you prescribe **all available** medications for your patients as your **own** professional initiative? |  | | |
| if not, for which morbidity require prescription by supporting from specialists?  DM, HYP, COPD, Cancers |  |  |  |
|  |  |  |
| Competences **for referral** as **own** initiative: |  |  |  |
| imagination examinations? | for Xray | for MRI | for CT |
| Is the method of „***telemedicine***” regulated? (contacting patients with email, phone, mail etc? |  | | |
| How is it paid /reimbursed? |  | | |
| Which body is the **main** organizer/provider of CME programme? | university? | Medical Chamber? |  |
| Can you **prescribe medication** electronically? |  | | |
| Can you **refer patients for specialist** electronically? |  | | |
| Can you access the electronic health records of **your own** patients after treated by **specialist** or in **hospital** **care**? |  | | |
| Which **coding system** is used in primary care? | ICD? | ICPC? | other? |
| **DIAGNOSTIC** TOOLS | | | |
| is common (approx.in which %/) using Point of Care devices **/PoC/** in the GP practice?  Please list some of devices: |  |  | |
| Is any education provided to use PoC devices?  If yes, does it need any type of **exam** or **licensing**? |  |  | |
| How is it financed? | by the patients | by the Insurance? |  |
| **POSITION of Primary care** | | | |
| Is primary care popular for graduating medical students?  please describe your experiences |  | | |
| Is any selection required for enrolling into residency programme? |  |  |  |
| How many *years* last the residency programme? |  | |  |
| **FINANCING** | | | |
| how are GP financed/contracted?  What type of financing exist? | insurance companies | national insurance  by the State | private |
| **Nett income** of an average GP? from to EUR/months | from | to |  |
| Does it depend from the **years** spent in the practice?  if yes, in what extent? |  | | |
| The main contributors, compositions of income/financing for GPs?  Please describe and give calculated ratio |  | | |
| Are any **quality indicators** in the financing?  please give some of them: |  |  |  |
| How many **%** of financing depends from quality indicators? | from | to |  |
| Average time for working, including home visits and office works hours/day or hours/week | daily | weekly |  |
| **WORKING** conditions:  Are GPs usually working individually or are members of group practices or employee? |  | | |
| GPs are working (in general) | as employee | own enterprises | contractors |
| Is it common for GPs to working together in **group practices**? |  |  |  |
| If group practices are working, what other specialties contribute?  ie: dietitians, psychologist, physiotherapist? |  | | |
| Is it common for GPs to working in **part time**? |  |  |  |
| **OTHER**  professional activities | | | |
| How the emergency service is organized generally? |  |  |  |
| Are **compulsory** for GPs to participate in any type of **emergency services or Out-of- Hour services**? |  | |  |
| Do GPs provide any type of **occupational medicine**?  please describe: |  | |  |
| If GP has board examination in **any other specialty**, can it be used in primary care?  Give example: |  | |  |
| Is it common among GPs to have **other** board examination/specialty? |  |  |  |
| THANKS AGAIN YOUR HELP, EFFORTS AND TIME!  If a paper from these collected data will be published, do you allow to be **acknowledged** by name and by country? **No/ Yes** | | | |
